# Supplementary material for: State of Crop Landraces in Arcadia (Greece) and In-Situ Conservation Potential
Source: MDPI journal article supplement (doi:10.3390/d13110558), 2021-11-01
Supplement: s1 [file s1]

Archive with 1 entries (1 files):
- diversity-1437814 revised supplementary.pdf
