# Supplementary material for: State of Crop Landraces in Arcadia (Greece) and In-Situ Conservation Potential
Source: MDPI journal article supplement (doi:10.3390/d13110558), 2021-11-01
Supplement: s1 [file s1 › diversity-1437814 revised supplementary.pdf]

**Table S1.** The Agricultural University of Athens missions in Arcadia, collectors, samples per mission and botanical families of the samples.

| Dates                | Collector                          | Samples<br>number | Botanical families of species<br>collected                                                             |
|----------------------|------------------------------------|-------------------|--------------------------------------------------------------------------------------------------------|
| 9-11 March 2018      | R. Thanopoulos, N-M.<br>Koustouros | -                 | -                                                                                                      |
| 7-10 June 2018       | R. Thanopoulos, N-M.<br>Koustouros | 16                | Amaryllidaceae, Cucurbitaceae,<br>Fabaceae, Poaceae, Solanaceae                                        |
| 6-9 July 2018        | R. Thanopoulos, N-M.<br>Koustouros | 16                | Cucurbitaceae, Fabaceae, Poaceae,<br>Solanaceae                                                        |
| 30-31 July 2018      | P. Bebeli                          | 4                 | Cucurbitaceae, Fabaceae, Poaceae                                                                       |
| 28-30 September 2018 | R. Thanopoulos, N-M.<br>Koustouros | 10                | Fabaceae, Poaceae, Solanaceae                                                                          |
| 16-18 Nov. 2018      | R. Thanopoulos, N-M.<br>Koustouros | 13                | Fabaceae, Poaceae                                                                                      |
| 15-16 March 2019     | R. Thanopoulos                     | 2                 | Poaceae                                                                                                |
| 24-30 August 2019    | P.J. Bebeli                        | 36                | Amaranthaceae, Asteraceae,<br>Cucurbitaceae, Fabaceae,<br>Lamiaceae, Malvaceae, Poaceae,<br>Solanaceae |
| 17-20 June 2021      | T. Chatzigeorgiou                  | 15                | Fabaceae, Juglandaceae, Oleaceae,<br>Poaceae, Solanaceae                                               |

**Table S2.** Cereal landrace names, their explanations and occurrence from 1914 to 2021.

| Species | Landrace names       | Name explanations<br>meanings | 1914<br>[47] <sup>1</sup> | 1929<br>[48] | 1948<br>[44] | 1959<br>[45] | 1968<br>[26] | 1973<br>[57] | 2006<br>[33] | 2018-2021      | Collected<br>in 2018-<br>2021 |
|---------|----------------------|-------------------------------|---------------------------|--------------|--------------|--------------|--------------|--------------|--------------|----------------|-------------------------------|
| Oat     | Proimi               | early ripening                |                           |              |              |              |              |              |              | x <sup>2</sup> | x                             |
|         | Opsimi               | late ripening                 |                           |              |              |              |              |              |              | x              | x                             |
| Wheat   | Arapiko (introduced) | with black awns               |                           |              |              |              | x            |              |              |                |                               |
|         | Asprostaro           | white wheat                   | x                         | x            | x            | x            | x            |              |              | x              | x                             |
|         | Chondrostaro         | thick wheat seed or<br>ear    |                           |              |              | x            |              |              |              |                |                               |
|         | Driminitsa           |                               |                           |              | x            | x            |              |              | x            |                |                               |

|       |                              |                                                                   |   |   |   |   |   |   |   |
|-------|------------------------------|-------------------------------------------------------------------|---|---|---|---|---|---|---|
| Maize | Grinias                      |                                                                   |   |   |   | x |   |   |   |
|       | Koutroulis                   |                                                                   |   |   |   | x |   |   |   |
|       | Mavragani                    | the wheat with black awns                                         |   | x | x | x |   | x | x |
|       | Mavragani Vytinis            | the wheat with black awns from Vytina                             | x |   |   |   |   |   |   |
|       | Plaka                        | flat shaped                                                       |   |   |   | x |   |   |   |
|       | Platitsa                     | with wide ear                                                     |   |   |   | x |   |   |   |
|       | Psilositaro                  | thin wheat                                                        |   |   |   |   |   |   |   |
|       | Rousias                      | from Russia                                                       |   |   |   |   |   |   |   |
|       | Trimini                      | three-month wheat, it was a landrace of spring wheat              | x |   |   |   |   |   |   |
|       | Tserto (introduced in 1950s) |                                                                   |   |   |   |   |   | x |   |
|       | Tsougrias                    |                                                                   |   | x | x | x |   | x | x |
|       | Vlachostaro                  | wheat that the wheat that originates from nomadic tribe of Vlachs |   | x | x |   |   |   |   |
|       | Zoulitsa                     |                                                                   | x | x | x | x |   | x | x |
|       | Arapositi                    | the wheat from Arapia = north Africa                              |   |   |   |   |   | x | x |
|       | Arapositi koukla             |                                                                   | x |   |   |   |   | x |   |
|       | Arapositi xiriko             | tollerant to drought                                              |   |   |   |   |   | x | x |
|       | Daras                        | from Daras                                                        |   |   |   |   | x |   |   |
|       | Kokkino                      | with red seeds                                                    |   |   |   |   |   | x |   |
|       | Kremasto                     | with hanged cob                                                   |   |   |   |   |   | x | x |
|       | Mavro                        | with black seeds                                                  |   |   |   |   |   | x |   |

|              |                                                     |   |
|--------------|-----------------------------------------------------|---|
| Bertzovitiko | from Bertzovo former<br>name of Partheni<br>village | x |
| Milia        | from Milia                                          | x |
| Tripolis     | from Tripoli                                        | x |

<sup>1</sup>number within [] indicates the source of the information regarding the names of the landraces, <sup>2</sup>“x” indicates occurrence during the year within its column this landrace is located

**Table S3.** Legume landrace names, their explanations and occurrence from 1914 to 2021.

| Species     | Landrace names       | Name explanations meanings                             | 1914<br>[47] <sup>1</sup> | 1960<br>[60] | 2006<br>[33] | 2018-2021      | Collected<br>in 2018-<br>2021 |
|-------------|----------------------|--------------------------------------------------------|---------------------------|--------------|--------------|----------------|-------------------------------|
| Common bean | Chandra              | bead                                                   |                           |              |              | x <sup>2</sup> | x                             |
|             | Chelmou              | from Chelmos                                           |                           |              | x            |                |                               |
|             | Chorozia             |                                                        |                           |              |              | x              | x                             |
|             | Entopios lefkos      | local white, due to seed color                         |                           | x            |              | x              | x                             |
|             | Nestanis             | from Nestani                                           |                           | x            |              |                |                               |
|             | Nana                 | dwarf because they do not gain much<br>height          |                           | x            |              |                |                               |
|             | Tegeas               | from Tegea                                             |                           | x            |              |                |                               |
|             | Mparmpounia          | red mullet because of their color                      |                           | x            | x            | x              | x                             |
|             | Entopios Kakkouri    | local to Kakkourion (Artemisio)                        |                           | x            | x            |                |                               |
|             |                      | vanilla because of their seed color and<br>sweet taste |                           |              | x            |                |                               |
|             | Vanilies             |                                                        |                           |              |              |                |                               |
|             | Kontoula             | short or dwarf                                         |                           |              | x            | x              | x                             |
|             | Tsaoulia             | strifta wide Tsaoulia                                  |                           |              | x            | x              | x                             |
|             |                      | fardia twisted Tsaoulia                                |                           |              |              | x              | x                             |
|             | Mavro fasoli         | black colored bean                                     |                           |              | x            |                |                               |
|             | Skoura               | dark (yellow) seed color                               |                           |              |              | x              | x                             |
|             |                      | garfish to indicate the slender and long<br>pod        |                           | x            |              |                |                               |
|             | Zargania             |                                                        |                           |              |              |                |                               |
|             | Imi-gigantes Vytinis | semi-giant seed sized from Vytina                      |                           | x            |              | x              |                               |
|             | Lopia aspra          |                                                        | x                         |              |              | x              | x                             |

|                  |                   |                  |                             |   |   |
|------------------|-------------------|------------------|-----------------------------|---|---|
|                  |                   | mavra            |                             | x | x |
|                  | Ntopia            | Alonistainiotika | local to Alonistaina        | x | x |
| <b>Cowpea</b>    | Ntopia            |                  | local                       | x | x |
|                  | Argeitiko         |                  | from Argos                  |   |   |
|                  | Charonia          |                  |                             |   |   |
| <b>Faba bean</b> | Kouki ntopio      |                  | local faba bean             | x |   |
|                  | Platokoukia       |                  | wide seed shaped faba beans | x |   |
|                  | Psania            |                  |                             | x |   |
|                  | Kouki Tripoleos   |                  | from Tripoli                | x |   |
| <b>Lathyrus</b>  | Vikos o Ellinikos |                  | the greek vetch             |   | x |
| <b>Chickpea</b>  | Metria revithia   |                  | middle-seed-sized chickpeas | x |   |
|                  | Mikra revithia    |                  | small- seed-sized chickpeas | x |   |
|                  | Maltezika         |                  | from Malta                  | x |   |
|                  | Platia faki       |                  | wide seed shaped lentil     | x |   |
|                  | Psili faki        |                  | small seed lentil           | x |   |
|                  | Aspri faki        |                  | white seed colored lentil   | x |   |
|                  | Mavri faki        |                  | black seed colored lentil   | x |   |

<sup>1</sup> number within [] indicates the source of the information regarding the names of the landraces, <sup>2</sup> “x” indicates occurrence during the year within its column this landrace is located
